# Supplementary material
Source: MDPI journal article supplement (https://www.mdpi.com/2504-477X/5/12/318)
Supplement: s1 [file s1]

# Supplementary Materials: The Mechanism of Joint Reduction of $\text{MoO}_3$ and $\text{CuO}$ by Combined $\text{Mg/C}$ Reducer at High Heating Rates

Hasmik Kirakosyan <sup>1,\*</sup>, Khachik Nazaretyan <sup>1</sup>, Sofiya Aydinyan <sup>1,2</sup> and Suren Kharatyan <sup>1</sup>

<sup>1</sup> A.B. Nalbandyan Institute of Chemical Physics NAS RA, P. Sevak 5/2, 0014, Yerevan, Armenia;

khachik.nazaretyan@ichph.sci.am (K.N.); sofiya.aydinyan@taltech.ee (S.A.); suren@ichph.sci.am (S.K.)

<sup>2</sup> Department of Mechanical and Industrial Engineering, Tallinn University of Technology, Ehitajate 5, 19086 Tallinn, Estonia

\* Correspondence: hasmik.kirakosyan@ichph.sci.am; Tel: +374-9418-1606

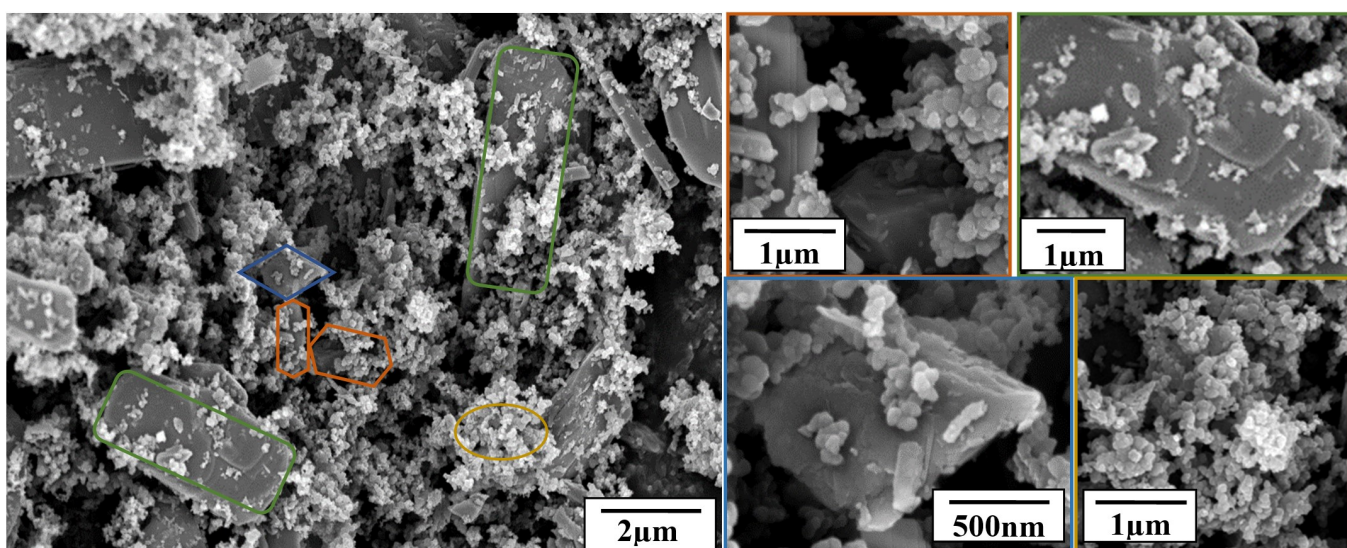

Figure S1. SEM analysis of the initial quaternary  $\text{CuO} + \text{MoO}_3 + 1.2\text{Mg} + 2.15\text{C}$  mixture.

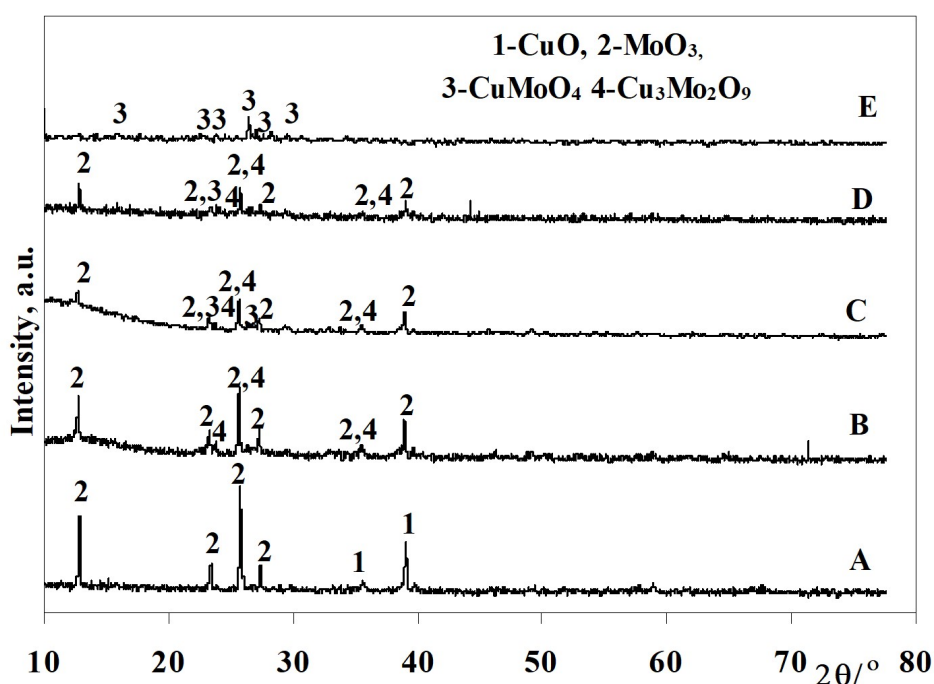

**Figure S2.** XRD patterns of the CuO+MoO<sub>3</sub> mixture; A - T = 773, B - 923, C - 1023, D - 1073, E - 1073 (t<sub>h</sub> = 10 min) K, V<sub>h</sub> = 300 K min<sup>-1</sup>.

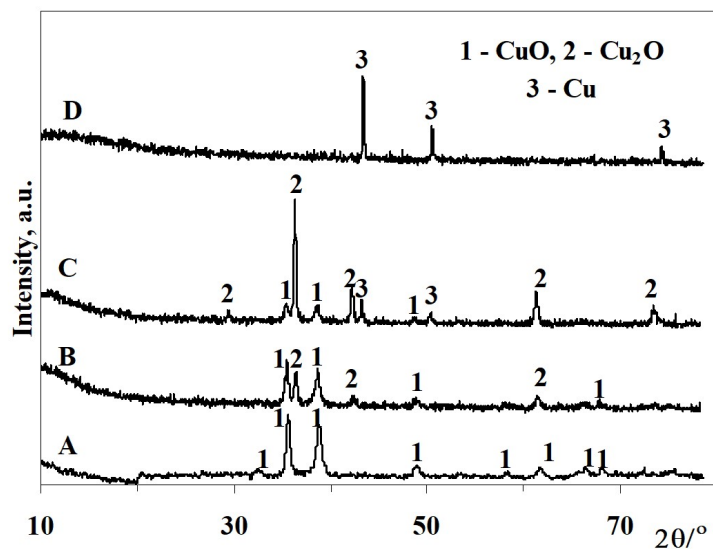

**Figure S3.** XRD patterns of the CuO+C mixture; A - T = 773, B - 873, C - 973, D - 1153 K, V<sub>h</sub> = 300 K min<sup>-1</sup>.

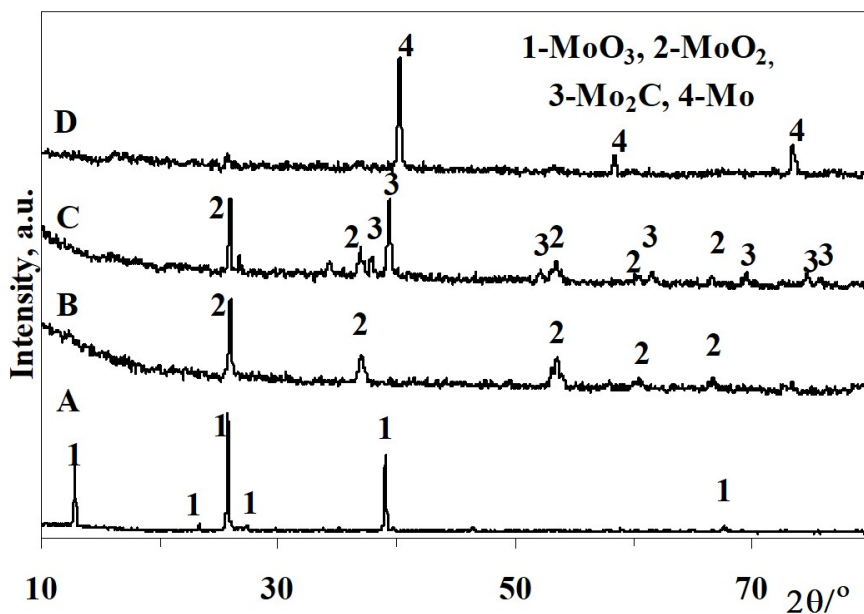

**Figure S4.** XRD patterns of the MoO<sub>3</sub> + 2C mixture; A - T=893, B - 1063, C - 1373, D - 1573 K, V<sub>h</sub> = 300 K min<sup>-1</sup>.

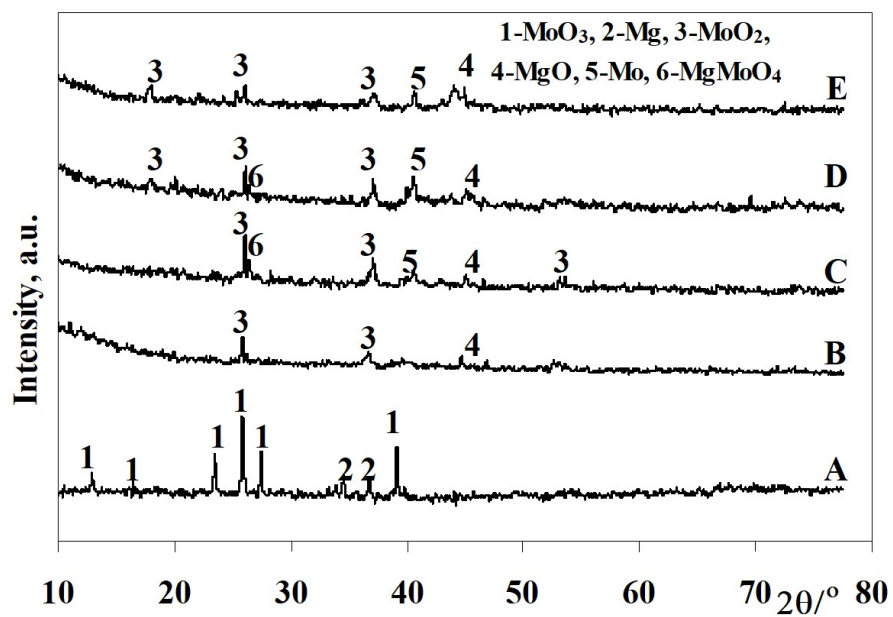

**Figure S5.** XRD patterns of the  $\text{MoO}_3 + 3\text{Mg}$  mixture; A – T = 923, B - 1048, C - 1203, D - 1323, E - 1573 K,  $V_h = 300 \text{ K min}^{-1}$ .

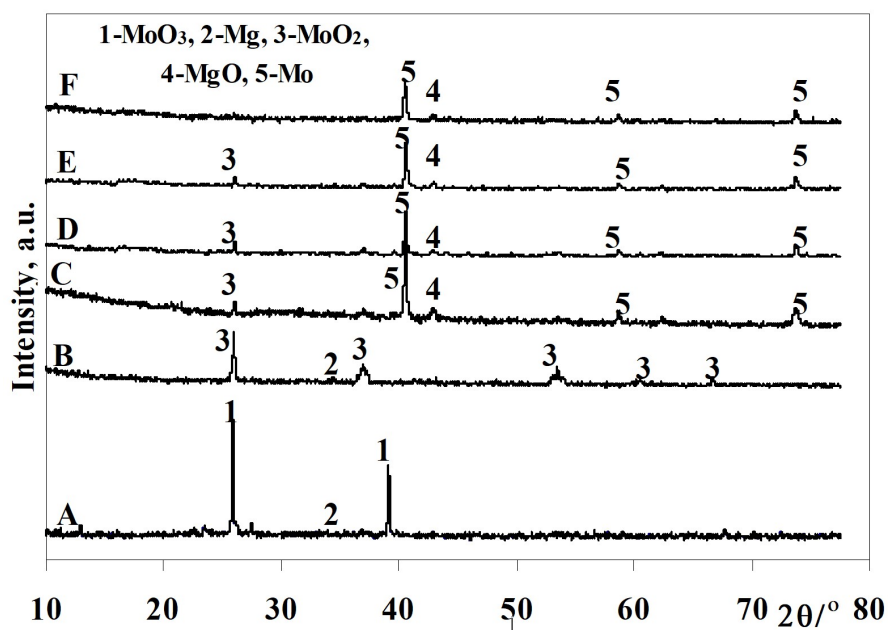

**Figure S6.** XRD patterns of the  $\text{MoO}_3 + 1.5\text{Mg} + \text{C}$  mixture; A - T = 923, B - 1073, C - 1153, D - 1273, E - 1423, F - 1573 K,  $V_h = 300 \text{ K min}^{-1}$ .

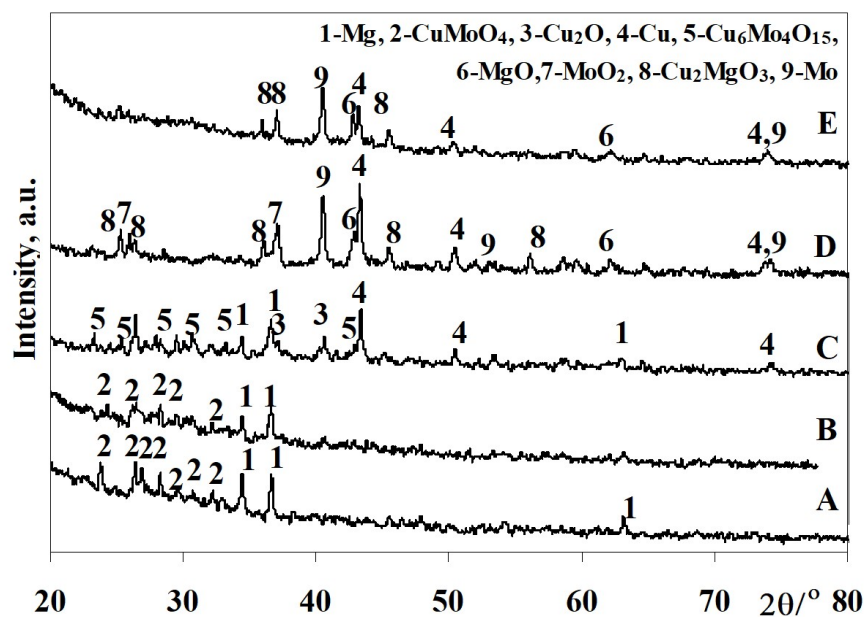

**Figure S7.** XRD patterns of the  $\text{CuMoO}_4 + 4\text{Mg}$  mixture; A – T = 923, B - 1123, C - 1323, D - 1413, E - 1573 K,  $V_h = 300 \text{ K min}^{-1}$ .

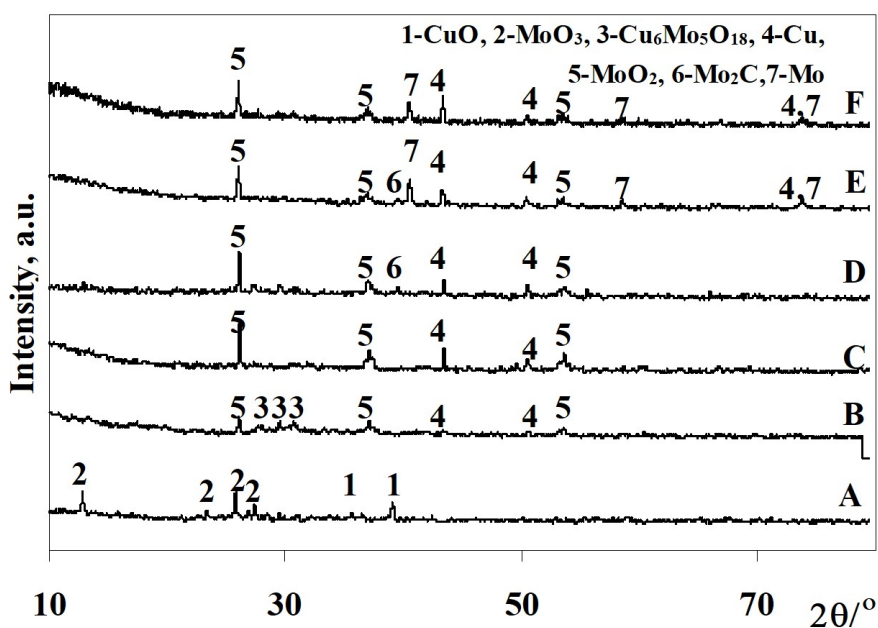

**Figure S8.** XRD patterns of the  $\text{CuO} + \text{MoO}_3 + 3\text{C}$  mixture; A – T = 803, B - 913, C - 1023, D - 1273 E - 1393, F - 1573 K,  $V_h = 300 \text{ K min}^{-1}$ .



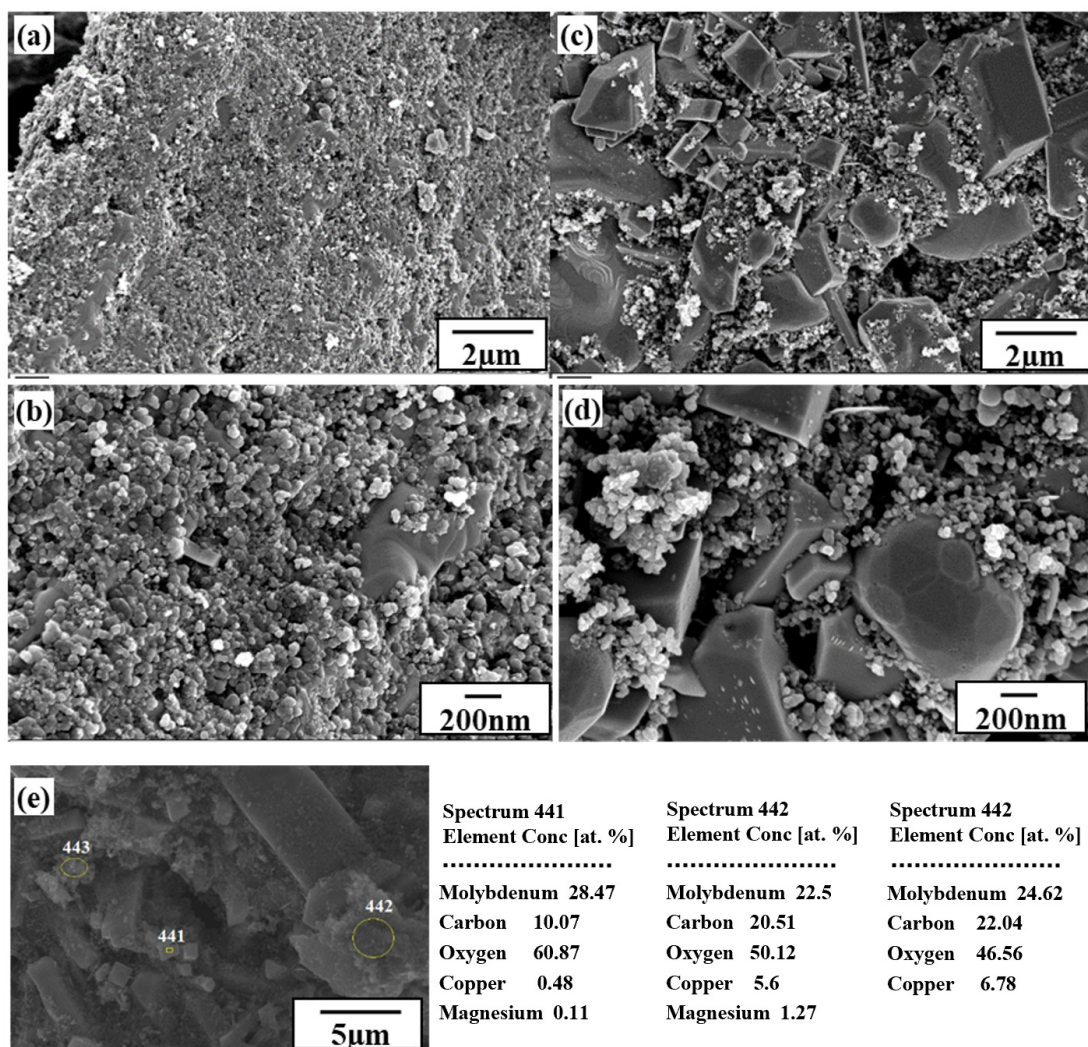

Figure S9. SEM/EDS analyses of the quenched sample at 1023 K (a, c) and 1163 K (b, d, e).

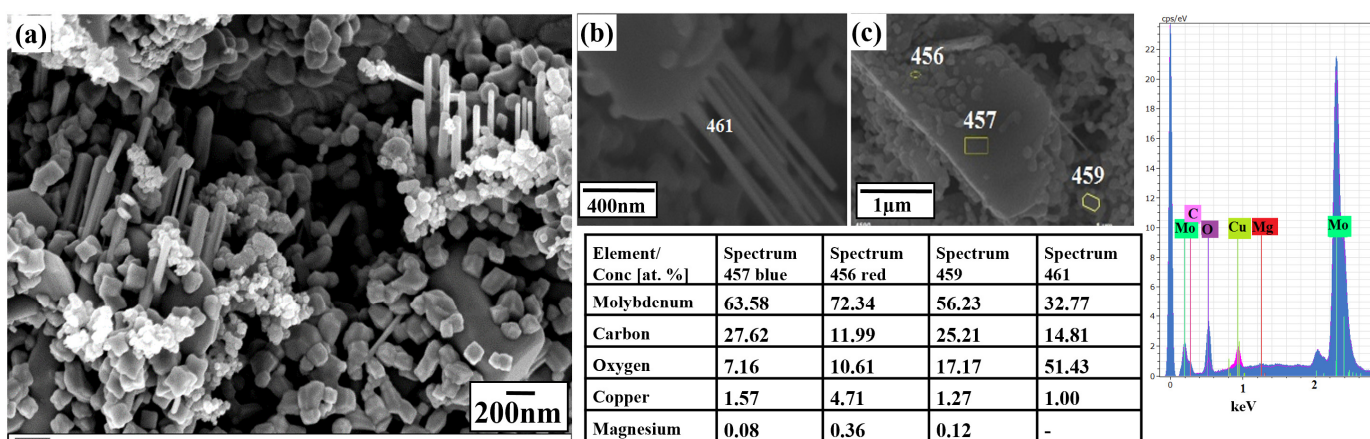

Figure S10. SEM/EDS analyses of the quenched sample at 1573 K (a, b, c).
